# Supplementary figures and images for: Nivolumab and Stereotactic Radiosurgery for Patients With Breast Cancer Brain Metastases: A Nonrandomized, Open-Label Phase 1b Study
Source: PubMed Central journal article supplement — Adv Radiat Oncol. 2021 Sep 11;6(6):100798. doi: 10.1016/j.adro.2021.100798 (PMC8655428; doi:10.1016/j.adro.2021.100798), 2021-09-11

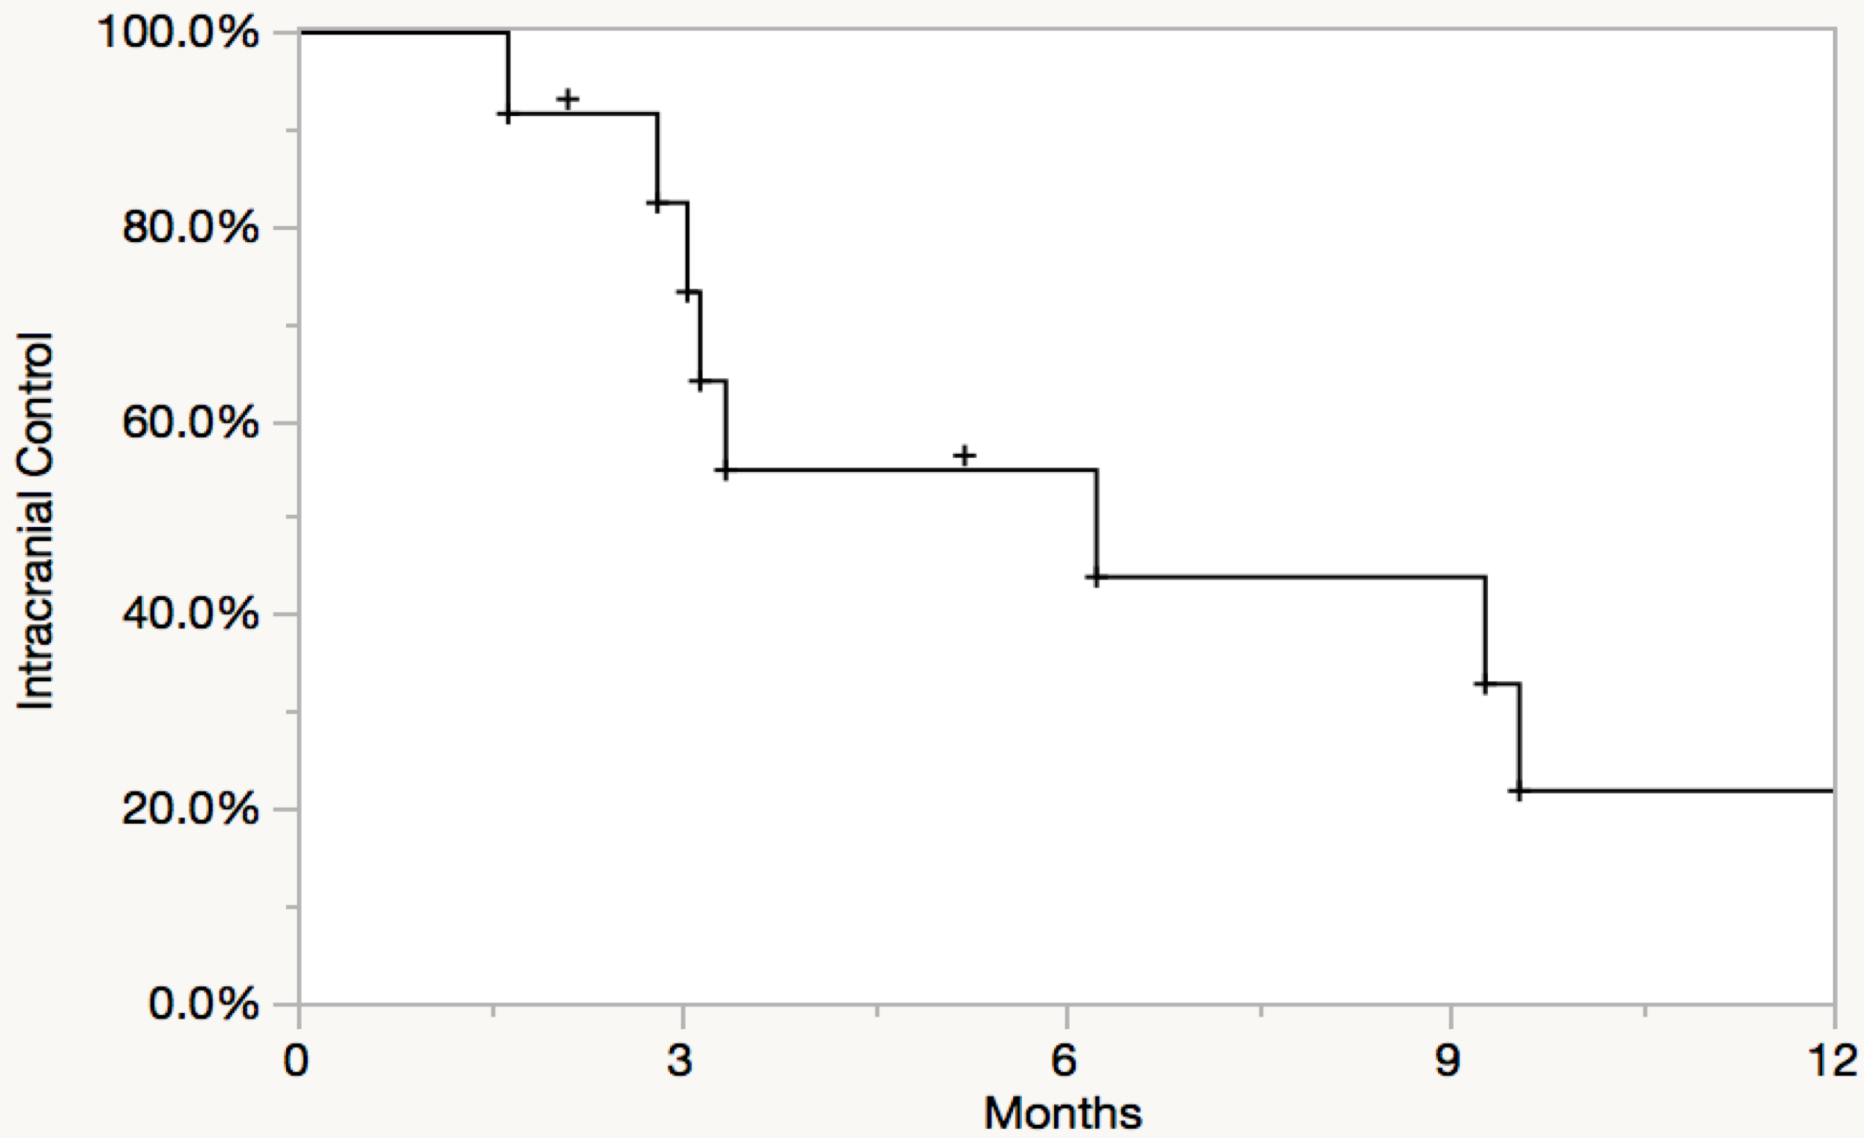

No. at Risk

| Months | No. at Risk |
|--------|-------------|
| 0      | 12          |
| 3      | 10          |
| 6      | 6           |
| 9      | 5           |
| 12     | 3           |

Supplement: mmc1.pdf [file mmc1.pdf]

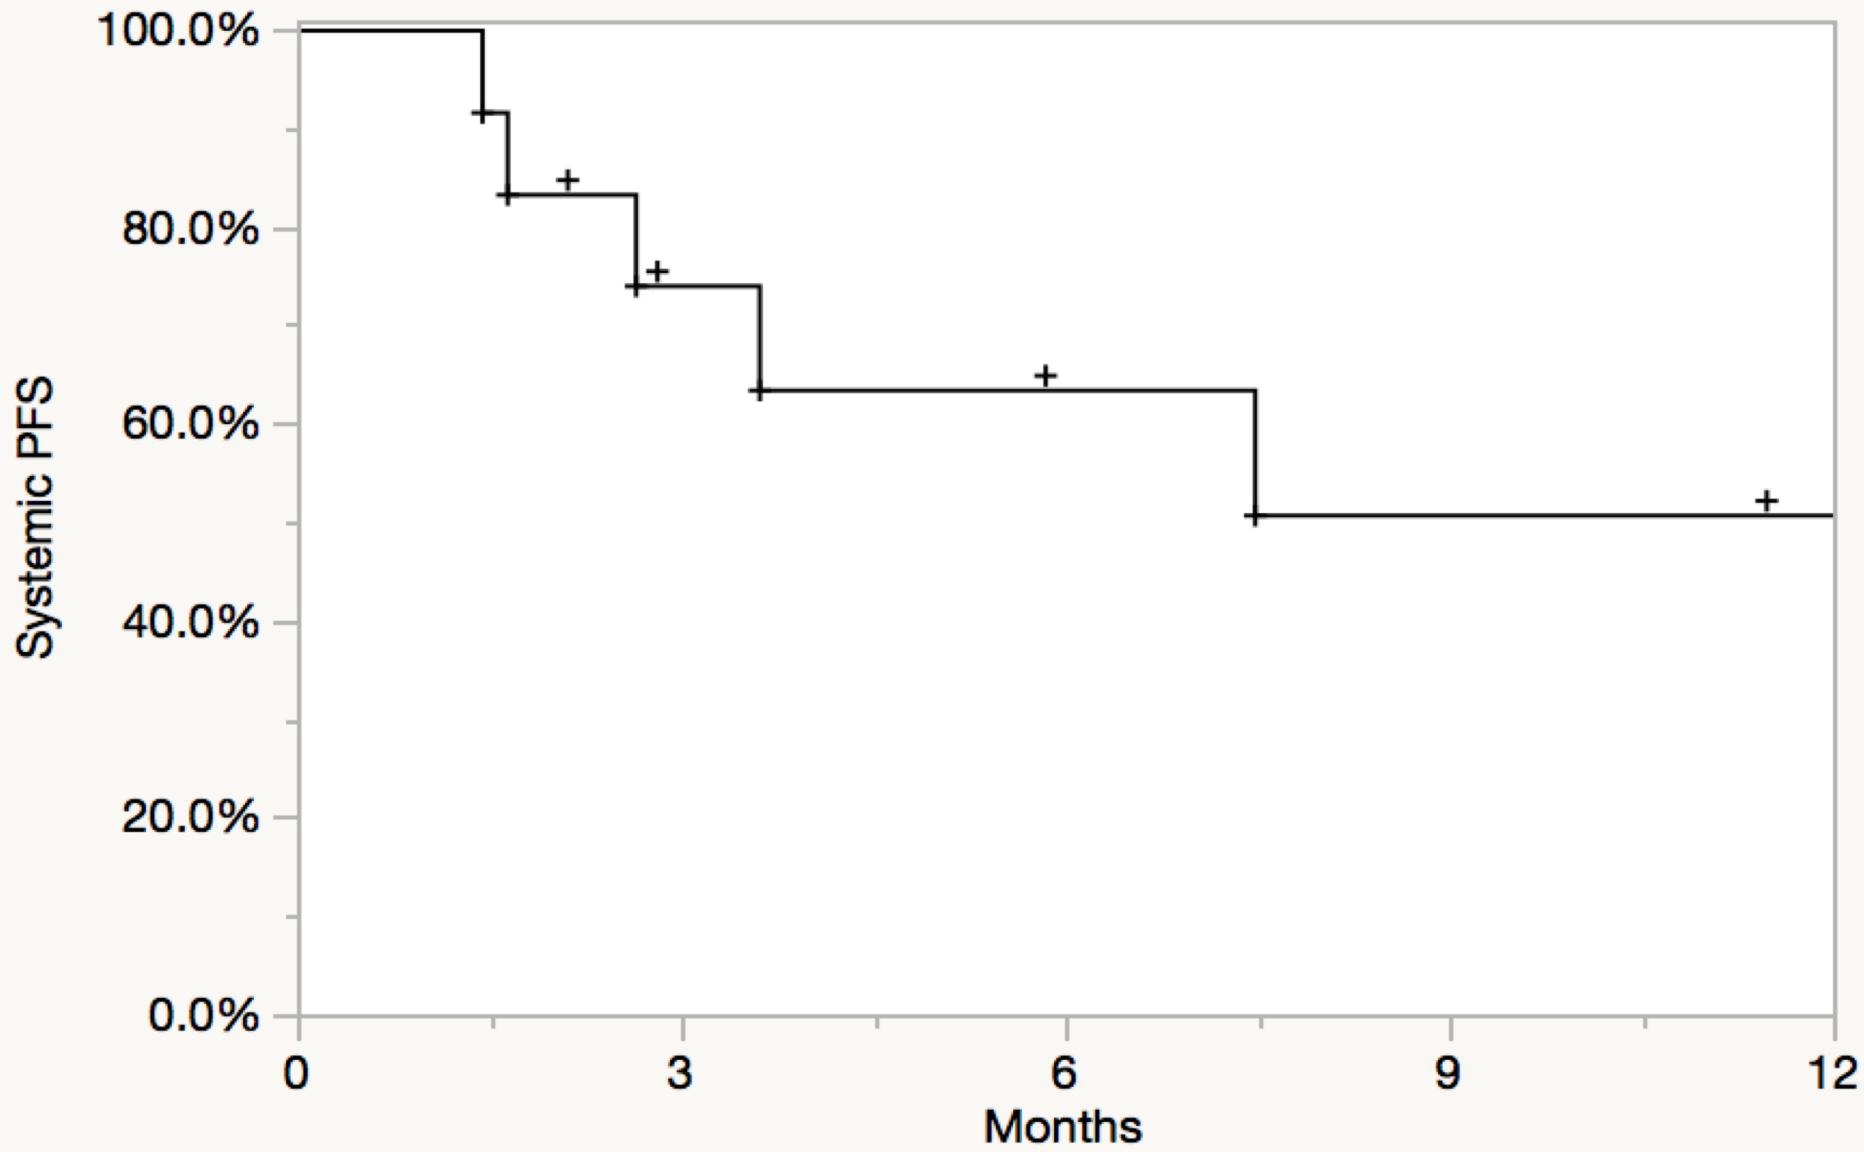

No. at Risk

12                      8                      6                      5                      4

Supplement: mmc2.pdf [file mmc2.pdf]
